# Supplementary material for: Ureaplasma parvum and urealyticum Prevalence in Symptomatic and Asymptomatic Reproductive Aged Gambian Women Seeking Primary Health Care: A Case - Control Study
Source: Research Square preprint supplement (doi:10.21203/rs.3.rs-4343437/v1), 2024-05-20
Supplement: Supplementary file 1 [file 28bcb1b3d62ab22dcdbff5d4.docx]

**Supplementary Table 1**

| **Primer and Probe name** | **Sequence** | **Amplicon size (bp)** |
| --- | --- | --- |
| Real time – PCR |  | 90 |
| UU – 1613 F | AAG GTC AAG GTA TGG AAG ATC CAA |  |
| UU – 1524 R | TTC CTG TTG CCC CTC AGT CT |  |
| UU-T960 | JOE –ACC ACA AGC ACC TGC TAC GAT TTG TTC – BHQ1 |  |
| UU – Parvo | FAM – TCC ACA AGC TCC AGC AGC AAT TTG – BHQ1 | 78 |
| MgPa – 355T | GAG AAA TAC CTT GAT GGT CAG CAA |  |
| MgPa – 432R | GTT AAT ATC ATA TAA AGC TCT ACC GTT ATC |  |
| MgPa – 380 | FAM – ACT TTG CAA TCA GAA GGT – BHQ1 | 144 |
| NG – F | AAC TGC CGG GCG TTT ATA TCG |  |
| NG – R | GAC CTT CGA GCA GAC ATC ACG |  |
| NG probe | JOE – ACC GAA GCC GCC AGA ATA GAG CAA CA – BHQ1 | 111 |
| CT – F | GCC AAT CTT CTT TGA AGC GTT GTG |  |
| CT – R | CTA GGG TGC TCA GAC TCC GAC |  |
| CT probe | FAM –TG AAGGTCACAGGACACGCAACCCCA – BHQ1 |  |
| **PCR Primers** |  |  |
| MG16 – 45 F | TAC ATG CAA GTC GAT CGG AAG TAG | 427 |
| MG16 – 447 R | AAA CTC CAG CCA TTG CCT GCT AG |  |

**Table 1**

| Pathogen | Symptomatic    n = 115 | | Asymptomatic  n = 117 | | Overall Distribution  (n= 232) | |
| --- | --- | --- | --- | --- | --- | --- |
| N | % | N | % | N | % |
| *U. parvum* | 38 | 33.0 | 41 | 35.0 | 79 | 34.1 |
| *U. urealyticum* | 8 | 7.0 | 17 | 14.5 | 25 | 10.8 |
| *U. parvum & U. urealyticum* | 1 | 0.9 | 2 | 1.7 | 3 | 1.3 |
| Total | 47 | 40.9 | 60 | 51.2 | 107 | 46.2 |

**Table 2**

**Serotypes**

| **Anatomical sites** | **1** | **3** | **1/3/6/14** | **1/6/14** | **10** |
| --- | --- | --- | --- | --- | --- |
| Cervix | 2 | 5 | 1 | 1 | 3 |
| Vagina | 5 | 17 | 1 | 1 | 6 |
| Both* | 9 | 36 | 1 | 3 | 16 |
| **Total participants** | **16** | **58** | **3** | **5** | **25** |

**Table 3**

|  | **Symptomatic group** | **Asymptomatic group** |
| --- | --- | --- |
| Ureaplasma species | n (%) | n (%) |
| *U. parvum* (n=79) |  |  |
| Total positive | 38(48.1) | 41(51.9) |
| Age group |  |  |
| 20 years | 1 (2.6) | 0 (0.0) |
| 21 – 25 | 6 (15.8) | 7 (17.1) |
| 26 – 30 | 10 (26.3) | 12 (29.3) |
| 31 – 35 | 10 (26.3) | 9 (21.9) |
| 36 – 40 | 2 (23.7) | 8 (19.5) |
| 41 – 49 | 9 (23.7) | 5 (12.2) |
| *U. urealyticum* (n=25) |  |  |
| Total positive | 8(32.0) | 17(68.0) |
| Age group |  |  |
| 20years | 1 12.5 | 1 (5.9) |
| 21 – 25 | 2 (25.0) | 6 (35.3) |
| 26 – 30 | 1 (12.5) | 3 (17.6) |
| 31 – 35 | 2 (25.0) | 4 (23.5) |
| 36 – 40 | 2 (25.0) | 2 (11.8) |
| 41 – 49 | 0 (0.0) | 1 (5.9) |
|  |  |  |

**Table 4**

| Variables | Case n (%) | Control n (%) |
| --- | --- | --- |
| Age at sexual debut**  <18  ≥18 | 43 (38.39)  69 (61.61) | 32 (27.35)  85 (72.65) |
| Number of lifetime sexual partner (s)  1  ≥2 | 60 (53.57)  52 (46.43) | 78(66.67)  39 (33.33) |
| Partner (s) had sex with others*  Yes  No  Don’t know/not sure | 36 (26.67)  8 (13.33)  16 (33.33) | 48 (60.00)  20 (25.00)  12 (15.00) |
| Sexual intercourse in the last 12 months  Yes  No | 95 (84.81)  17 (15.18) | 116 (99.15)  1 (0,85) |
| New Sexual partner (s) in the last 12 months  Yes  No | 21 (22.10)  74 (77.89) | 18 (15.65)  97 (84.35) |
| Condom use in the last 12 months.  Yes  No | 15 (15.79  80 (84.21) | 7 (6.03)  109 (93.97) |
| Female genital mutilation  Yes  No | 84 (73.04)  31 (26.96) | 61 (52.14)  56 (47.86) |
| Smoking  Yes/Quit  No | 3 (2.61)  112 (97.39) | 117 (100.00) |
| Hormone contraceptive use  Yes  No  Yes, but stopped using them | 53 (46.09)  47 (40.87)  15 (13.04) | 117(100.00) |
| History of Pregnancy  Yes  No | 93 (80.87)  22 (19.13) | 114 (97.44)  3 (2.56) |

**Table 5**

| **Variables** | ***Ureaplasma***  **n (%)** | **95% CI** | **P - value** |
| --- | --- | --- | --- |
| Hormone contraceptive used | 39 (75) | 1.5 (0.8,2.8) | 0.2 |
| ≥5 years pregnancies | 17 (32) | 1.3 (0.5, 3.0) | 0.6 |
| Sexual debut (<18 years old) | 26 (50) | 0.5 (0.3, 0.9) | 0.05 |
| New sexual partners (last 12 months) | 9 (17) | 0.3 (0.1, 1.0) | 0.05 |
| Condom used (last 12 months) | 7 (13) | 1.3 (0.5, 3.3) | 0.6 |
| FGM | 37 (71) | 0.8 (0.5, 1.4) | 0.7 |
